# Supplementary material for: Many, more, most: four risk profiles of adolescents in residential care with major psychiatric problems
Source: Springer Nature journal article supplement (doi:10.1186/s13034-017-0204-1), 2017-12-01
Supplement: MOESM1 [file 15319792]

Table S1 Differences between the classes in demographic and admission characteristics (N = 270)

|                                                            | Overall mean | Class 1<br>(n = 119) | Class 2<br>(n = 70) | Class 3<br>(n = 49) | Class 4<br>(n = 32) | Wald  | p    | Post hoc           |
|------------------------------------------------------------|--------------|----------------------|---------------------|---------------------|---------------------|-------|------|--------------------|
| Age at admission, in years                                 | 16.9         | 16.9                 | 17.6                | 16.8                | 15.6                | 24.44 | .000 | 1,2,3 > 4<br>2 > 3 |
| Immigrants (1 <sup>st</sup> or 2 <sup>nd</sup> generation) | 34.8%        | 26.4%                | 58.3%               | 21.7%               | 35.4%               | 13.70 | .003 | 2 > 1,3            |
| Most recent IQ                                             | 93.9         | 93.2                 | 91.9                | 97.2                | 97.1                | 6.13  | .110 | -                  |
| Earliest age of (outpatient) care                          | 8.6          | 9.1                  | 9.2                 | 8.0                 | 6.8                 | 8.33  | .040 | 1,2 > 4            |
| Only child                                                 | 15.4%        | 11.6%                | 15.8%               | 17.5%               | 25.6%               | 2.91  | .410 | -                  |
| Judicial measure                                           |              |                      |                     |                     |                     | 16.09 | .013 | 2,3 ≠ 4            |
| Criminal law                                               | 47.8%        | 46.1%                | 68.9%               | 46.6%               | 10.0%               |       |      |                    |
| Civil law                                                  | 43.7%        | 45.7%                | 29.5%               | 36.1%               | 79.1%               |       |      |                    |
| Voluntary                                                  | 8.5%         | 8.2%                 | 1.7%                | 17.3%               | 10.9%               |       |      |                    |

Table S2 Differences between the classes in psychopathology and substance use (N = 270)

|                                             | Overall mean | Class 1<br>(n = 119) | Class 2<br>(n = 70) | Class 3<br>(n = 49) | Class 4<br>(n = 32) | Wald   | p    | Post hoc           |
|---------------------------------------------|--------------|----------------------|---------------------|---------------------|---------------------|--------|------|--------------------|
| Disruptive behaviour disorder               | 48.9%        | 54.4%                | 60.8%               | 29.8%               | 32.2%               | 11.37  | .010 | 1,2 > 3<br>2 > 4   |
| Autism spectrum disorder                    | 42.6%        | 50.0%                | 17.4%               | 74.5%               | 20.1%               | 28.64  | .000 | 1,3 > 2,4<br>3 > 1 |
| Attention deficit/hyperactivity disorder    | 23.3%        | 28.7%                | 11.3%               | 23.3%               | 29.9%               | 4.01   | .260 | -                  |
| Substance disorder                          | 22.6%        | 33.1%                | 31.7%               | 0.2%                | 0.6%                | 194.67 | .000 | 1,2 > 3,4          |
| Reactive attachment disorder                | 12.6%        | 3.0%                 | 23.8%               | 5.7%                | 35.0%               | 15.83  | .001 | 2,4 > 1,3          |
| Schizophrenia or another psychotic disorder | 9.3%         | 11.9%                | 15.6%               | 0.1%                | 0.1%                | 103.47 | .000 | 1,2 > 3,4          |
| Mood disorder                               | 8.5%         | 8.9%                 | 8.0%                | 8.9%                | 7.6%                | .08    | .990 | -                  |
| Anxiety disorder                            | 8.1%         | 3.6%                 | 8.9%                | 10.1%               | 20.7%               | 7.38   | .061 | -                  |
| Personality disorder                        | 11.3%        | 5.5%                 | 29.8%               | 2.0%                | 11.3%               | 6.87   | .076 | -                  |
| Mental retardation                          | 5.9%         | 6.4%                 | 9.9%                | 3.0%                | 0.2%                | 6.16   | .100 | -                  |
| Soft drug use                               | 69.5%        | 98.0%                | 89.1%               | 2.8%                | 27.1%               | 49.64  | .000 | 1,2 > 3,4<br>4 > 3 |
| Hard drug use                               | 27.2%        | 37.0%                | 44.3%               | 0.2%                | 0.7%                | 214.33 | .000 | 1,2 > 3,4          |
| Alcohol use                                 | 72.7%        | 89.6%                | 89.3%               | 31.8%               | 39.8%               | 41.83  | .000 | 1,2 > 3,4          |

Table S3 Differences between the classes in criminal behaviour (N = 270)

|                                   | Overall mean | Class 1<br>(n = 119) | Class 2<br>(n = 70) | Class 3<br>(n = 49) | Class 4<br>(n = 32) | Wald  | p    | Post hoc           |
|-----------------------------------|--------------|----------------------|---------------------|---------------------|---------------------|-------|------|--------------------|
| No conviction                     | 18.9%        | 13.4%                | 10.5%               | 21.9%               | 53.1%               | 18.03 | .000 | 4 > 1,2,3          |
| Drug offence                      | 4.4%         | 7.5%                 | 2.6%                | 1.7%                | 1.3%                | 2.65  | .450 | -                  |
| Vandalism (property)              | 30.7%        | 40.7%                | 40.6%               | 10.3%               | 3.8%                | 12.59 | .006 | 1,2 > 3,4          |
| Property offence without violence | 45.2%        | 52.7%                | 67.6%               | 9.6%                | 23.7%               | 22.69 | .000 | 1,2 > 3,4          |
| Moderate violent offence          | 50.0%        | 55.8%                | 62.7%               | 36.3%               | 21.9%               | 12.25 | .007 | 1,2 > 4<br>2 > 3   |
| Violent property offence          | 19.6%        | 25.4%                | 29.6%               | 4.7%                | 0.3%                | 48.21 | .000 | 1,2 > 3,4<br>3 > 4 |
| Serious violent offence           | 7.8%         | 11.7%                | 7.0%                | 4.4%                | 0.2%                | 13.52 | .004 | 1,2,3 > 4          |
| Sex offence                       | 13.3%        | 2.0%                 | 12.9%               | 44.1%               | 9.1%                | 21.37 | .000 | 3 > 1,2,4          |
| Manslaughter                      | 3.3%         | 0.1%                 | 5.0%                | 4.2%                | 10.7%               | 2.61  | .460 | -                  |
| Arson                             | 0.7%         | 0.6%                 | 1.8%                | 0%                  | 0.1%                | 10.62 | .014 | 1,2 > 3            |
| Murder                            | 2.6%         | 1.0%                 | 5.8%                | 3.7%                | 0%                  | 12.10 | .007 | 2,3 > 4            |
| Age first criminal behaviour      | 13.8         | 14.2                 | 13.2                | 13.9                | 13.8                | 3.49  | .320 | -                  |
| Age first violent behaviour       | 14.4         | 14.8                 | 14.1                | 14.7                | 12.9                | 5.53  | .140 | -                  |

Table S4 Differences between the classes in life events (N = 270)

|                                                      | Overall mean | Class 1<br>(n = 119) | Class 2<br>(n = 70) | Class 3<br>(n = 49) | Class 4<br>(n = 32) | Wald  | P    | Post hoc           |
|------------------------------------------------------|--------------|----------------------|---------------------|---------------------|---------------------|-------|------|--------------------|
| Chronic illness or hospitalization                   | 15.0%        | 15.5%                | 20.5%               | 8.6%                | 11.2%               | 2.43  | .490 | -                  |
| Victim physical abuse (outside the family)           | 12.7%        | 8.4%                 | 19.9%               | 9.6%                | 18.3%               | 4.20  | .240 | -                  |
| Victim sexual abuse                                  | 8.3%         | 2.9%                 | 17.4%               | 8.0%                | 9.5%                | 4.52  | .210 | -                  |
| Victim discrimination                                | 2.7%         | 3.7%                 | 4.0%                | 0.1%                | 0%                  | 8.44  | .038 | 1,2 > 4            |
| Financial problems                                   | 18.1%        | 18.5%                | 36.1%               | 2.7%                | 2.6%                | 10.42 | .015 | 2 > 1,3            |
| Migration                                            | 17.1%        | 12.3%                | 29.9%               | 13.1%               | 13.2%               | 7.38  | .061 | -                  |
| Fled from another country                            | 3.7%         | 6.8%                 | 2.8%                | 0.1%                | 0.1%                | 15.68 | .001 | 1,2 > 3<br>1 > 4   |
| Out-of-home-placement                                | 46.5%        | 42.6%                | 48.3%               | 30.2%               | 82.4%               | 11.42 | .010 | 4 > 1,2,3          |
| Chronic illness or hospitalization of parents        | 21.7%        | 14.0%                | 27.0%               | 28.4%               | 28.1%               | 4.46  | .220 | -                  |
| Chronic illness or hospitalization of brother/sister | 3.1%         | 5.8%                 | 1.1%                | 1.8%                | 0%                  | 14.73 | .002 | 1,3 > 4            |
| Drug abuse parents                                   | 31.2%        | 9.2%                 | 70.8%               | 7.7%                | 61.3%               | 41.56 | .000 | 2,4 > 1,3          |
| Psychopathology parents                              | 39.9%        | 26.7%                | 60.1%               | 36.2%               | 51.3%               | 11.41 | .010 | 2 > 1,3            |
| Psychopathology brother/sister                       | 19.0%        | 15.1%                | 29.0%               | 13.4%               | 22.0%               | 3.59  | .310 | -                  |
| Divorced parents                                     | 64.3%        | 47.5%                | 87.7%               | 58.1%               | 86.0%               | 20.13 | .000 | 2,4 > 1,3          |
| Problems with new parent(s)                          | 19.0%        | 14.7%                | 32.9%               | 3.4%                | 29.4%               | 10.39 | .016 | 2,4 > 3<br>2 > 1   |
| Financial problems parents                           | 18.3%        | 5.7%                 | 36.9%               | 13.3%               | 33.9%               | 14.70 | .002 | 2,4 > 1<br>2 > 3   |
| Work problems or unemployment parents                | 25.0%        | 21.7%                | 29.2%               | 20.8%               | 35.0%               | 2.26  | .520 | -                  |
| Deceased parents                                     | 9.5%         | 8.3%                 | 13.8%               | 7.0%                | 9.3%                | 1.39  | .710 | -                  |
| Deceased brother/sister                              | 3.4%         | 4.1%                 | 4.7%                | 0%                  | 3.4%                | 22.92 | .000 | 1,2,4 > 3          |
| Victim bullying                                      | 49.2%        | 40.6%                | 50.3%               | 86.1%               | 19.5%               | 18.10 | .000 | 3 > 1,2,4<br>2 > 4 |
| Impregnated a girl                                   | 1.9%         | 0.3%                 | 2.2%                | 0%                  | 10.2%               | 19.03 | .000 | 2,4 > 3            |
